# Supplementary material for: Dietary Intake of Micronutrients and Disease Severity in Patients with Amyotrophic Lateral Sclerosis
Source: MDPI journal article supplement (doi:10.3390/metabo13060696), 2023-05-27
Supplement: s1 [file s1]

## Dietary intake of micronutrients and disease severity in patients with amyotrophic lateral sclerosis

Acsa Nara de Araújo Brito Barros, Maria Luisa do Nascimento Felipe, Isabelle Ribeiro Barbosa, Lucia Leite-Lais and Lúcia Fátima Campos Pedrosa

### Supplementary Material

**Table S1.** Differences in usual dietary intake of micronutrients according to ALS progression rate.

| Variable             | $\Delta$ FS <sup>a</sup>     |                         | <i>p</i> -value * |
|----------------------|------------------------------|-------------------------|-------------------|
|                      | Faster<br>$\geq 0.66$ (n=34) | Slower<br>< 0.66 (n=34) |                   |
| Vitamin A, $\mu$ g/d | 778 (2733)                   | 1069 (2358)             | 0.315             |
| Vitamin C, mg/d      | 163 (457)                    | 160 (125)               | 0.713             |
| Vitamin D, $\mu$ g/d | 4.7 (2.2)                    | 4.3 (2.4)               | 0.792             |
| Vitamin E, mg/d      | 15 (8.0)                     | 15 (8.7)                | 0.898             |
| Thiamin, mg/d        | 1.8 (0.4)                    | 1.9 (0.4)               | 0.995             |
| Riboflavin, mg/d     | 0.6 (0.9)                    | 0.7 (0.9)               | 0.291             |
| Niacin, mg/d         | 17 (9.9)                     | 15 (6.1)                | 0.477             |
| Pantothenic Acid, mg | 3.0 (2.0)                    | 3.4 (2.2)               | 0.699             |
| Pyridoxin, mg/d      | 1.6 (0.7)                    | 1.4 (0.6)               | 0.649             |
| Folate, mcg/d        | 164 (131)                    | 185 (137)               | 0.966             |
| Cobalamin, mcg/d     | 3.30 (35)                    | 3.7 (28.6)              | 0.316             |
| Phosphorus, mg/d     | 1029 (177)                   | 1069 (200)              | 0.342             |
| Calcium, mg/d        | 635 (289)                    | 797 (325)               | 0.073             |
| Iron, mg/d           | 13 (5.0)                     | 12 (9.7)                | 0.297             |
| Zinc, mg/d           | 8.3 (2.4)                    | 10 (2.9)                | 0.005             |
| Copper, mcg/d        | 1.3 (1.1)                    | 1.3 (1.1)               | 0.936             |
| Potassium, mg/d      | 2227 (495)                   | 2248 (491)              | 0.741             |
| Magnesium, mg/d      | 211 (61)                     | 235 (61)                | 0.659             |
| Selenium, $\mu$ g/d  | 55 (96)                      | 43 (39)                 | 0.778             |
| Manganese, mg/d      | 1.7 (0.5)                    | 1.6 (0.8)               | 0.468             |

Data presented as mean (standard deviation); <sup>a</sup>median as cutoff; \*The significance level is 0.05; Independent sample U Mann-Whitney test;  $\Delta$ FS, progression rate
